# Supplementary material
Source: PubMed Central journal article supplement (PMC6432940)

## Supplemental Figure S1. Flow diagram of MILK study participants included in this analysis

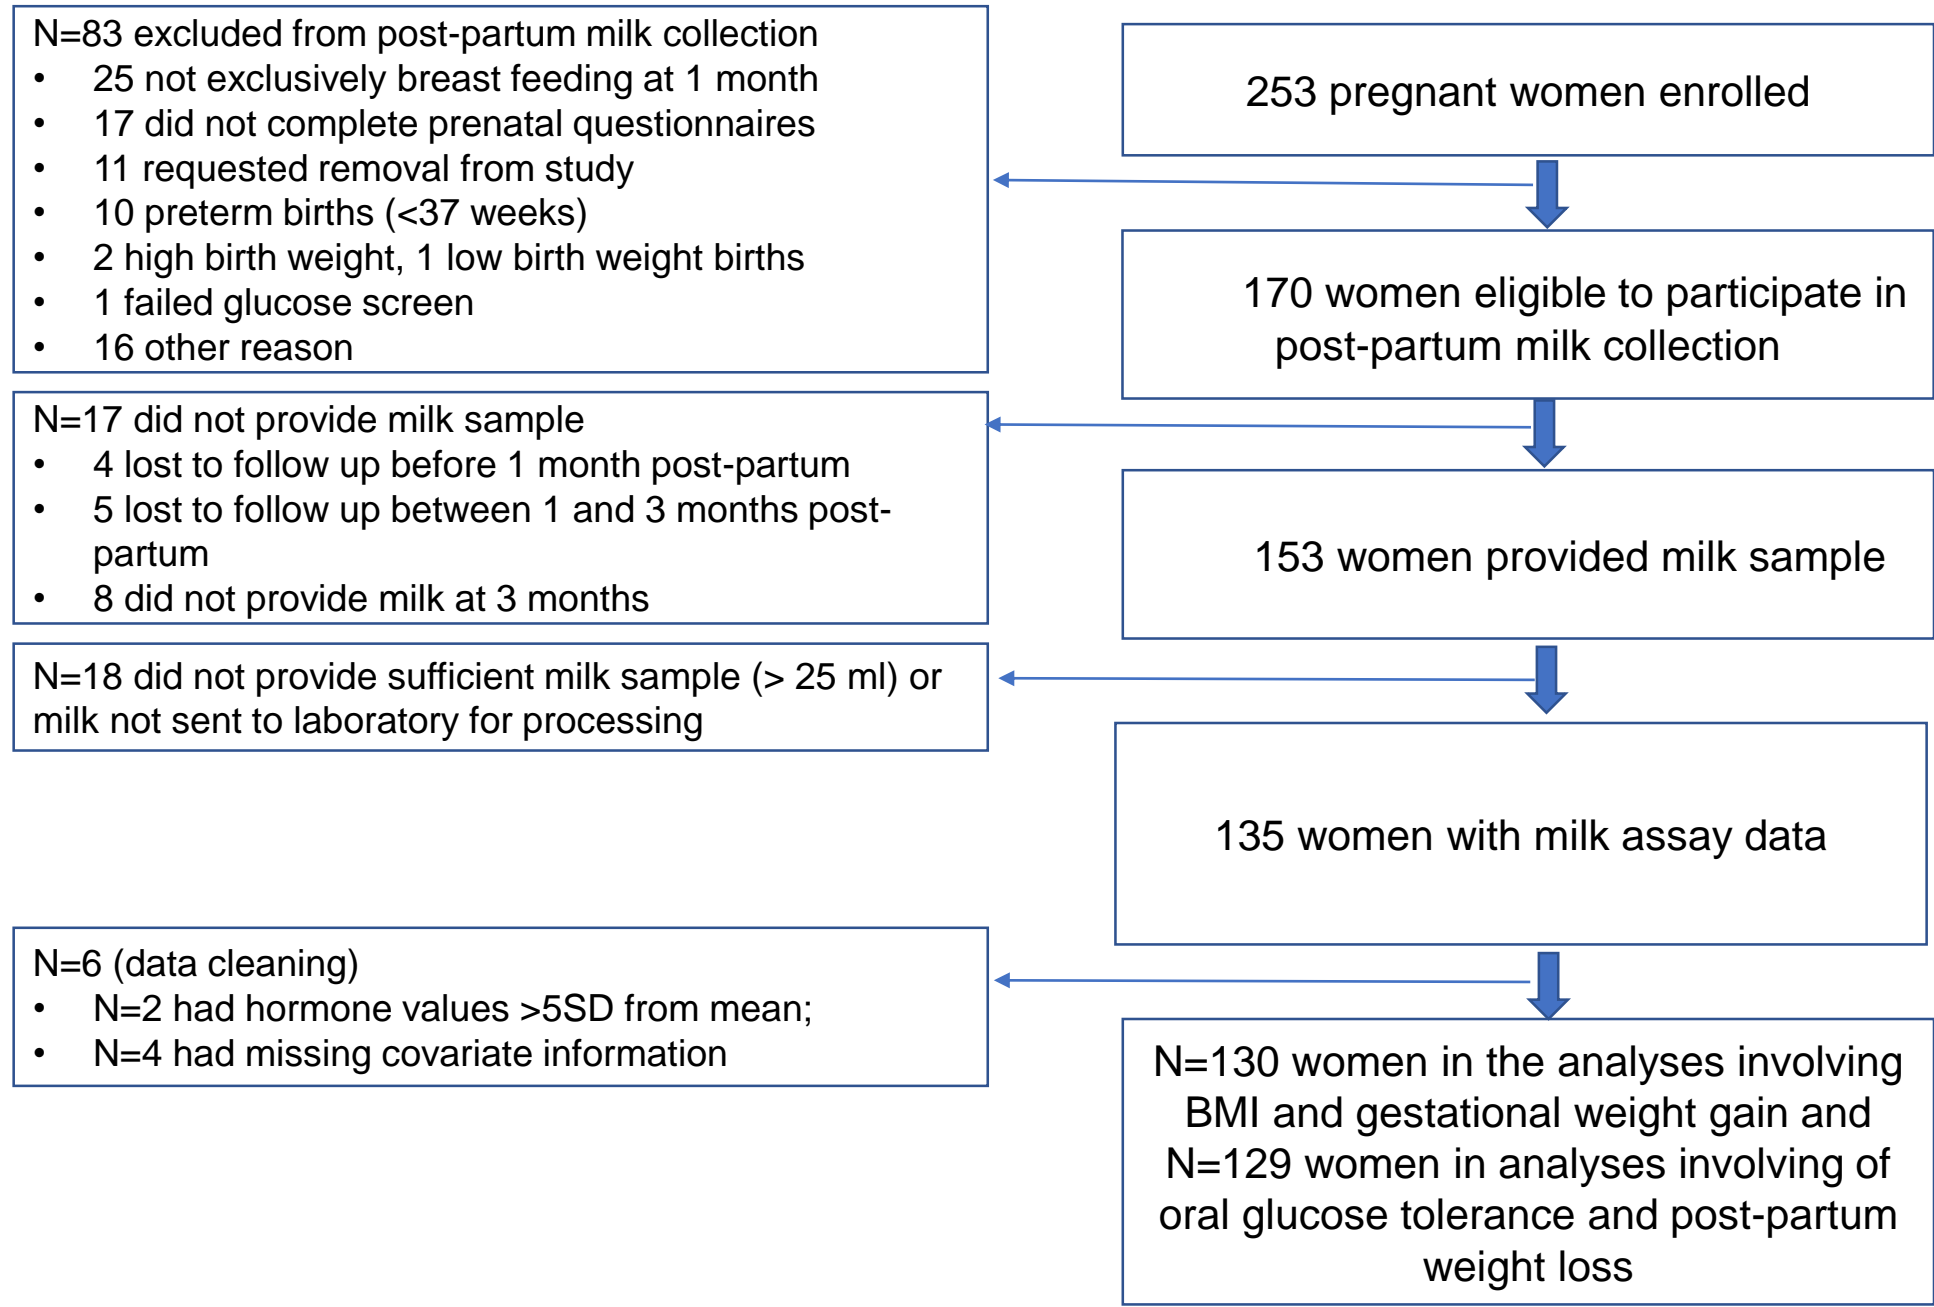

Supplement: NIHMS1006224-supplement-Supp_figS1.pdf [file NIHMS1006224-supplement-Supp_figS1.pdf]
